# Supplementary material
Source: PubMed Central journal article supplement (PMC8363206)
Supplement: NIHMS1730677-supplement-1.pdf [file NIHMS1730677-supplement-1.pdf]

Supplemental Material:

Fig. S1:

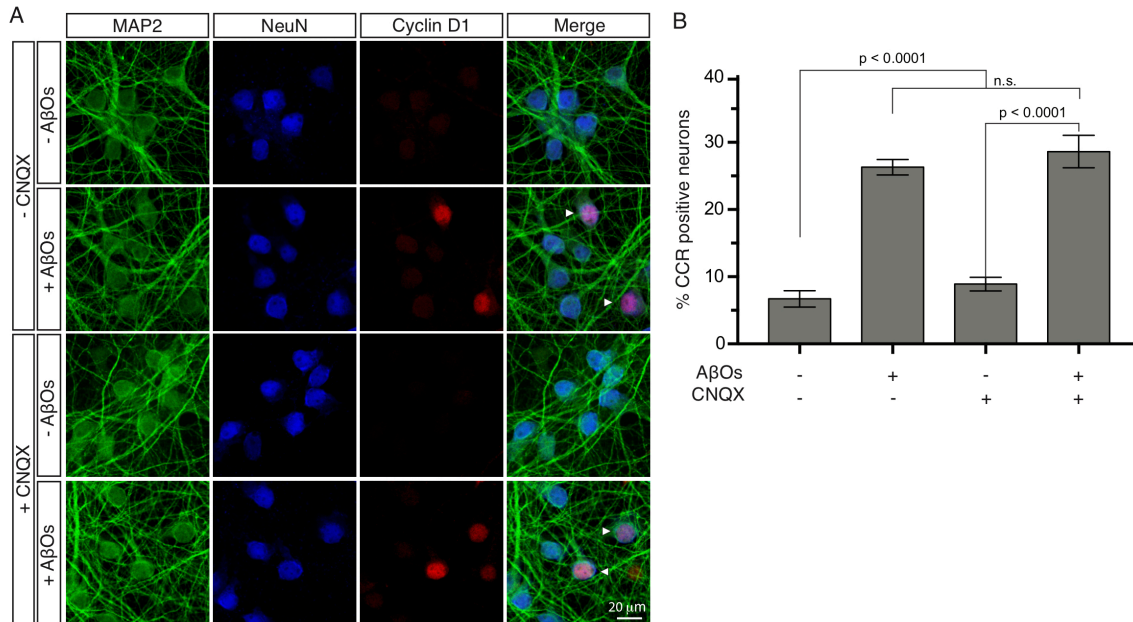

Fig. S1: The selective  $\alpha$ -amino-3-hydroxy-5-methyl-4-isoxazolepropionic acid receptor (AMPA) inhibitor, CNQX, does not inhibit CCR. (A) Primary cortical neurons were treated overnight with A $\beta$ Os with or without 10  $\mu$ M CNQX. After 18 hours of exposure to A $\beta$ Os, neurons were stained for MAP2, NeuN, and Cyclin D1 to mark neurons that had re-entered the cell cycle. (B) Quantification of the immunofluorescence results and statistical analysis by one-way ANOVA demonstrates that AMPAR inhibition by CNQX does not block A $\beta$ O-induced CCR. AMPAR therefore does not appear to modulate the A $\beta$ O-induced calcium entry that drives CCR. Error bars indicate s.e.m.

Supplemental Fig. 2:

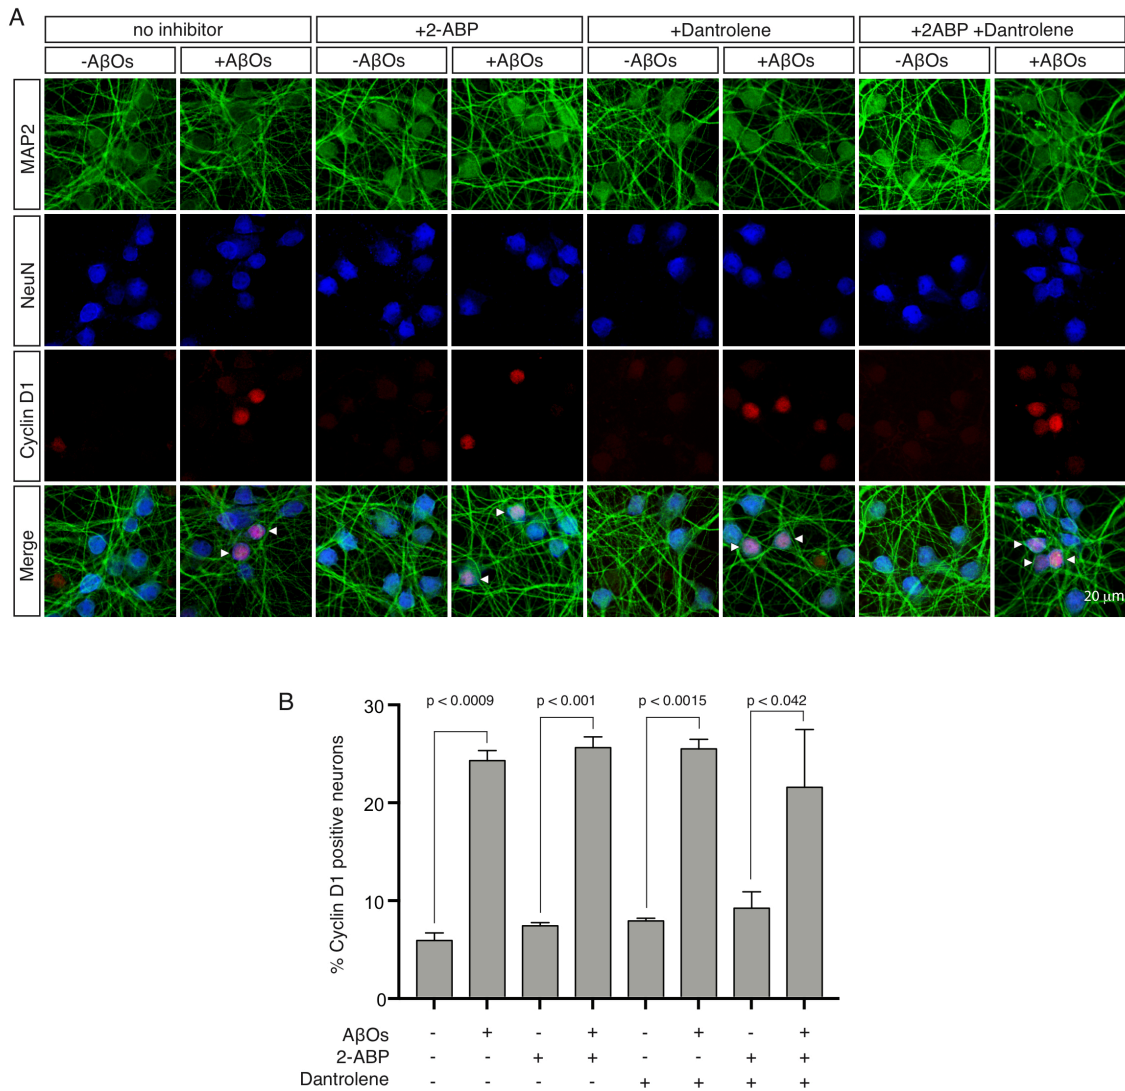

Fig. S2: Inhibitors of endoplasmic reticulum (ER) IP<sub>3</sub> and ryanodine receptors do not block activation of CCR. (A) Primary cortical neurons were treated overnight with A $\beta$ Os with or without 50  $\mu$ M 2-aminoethoxydiphenyl borate (2-APB) to block IP<sub>3</sub> receptors, 20  $\mu$ M dantrolene to block ryanodine receptors, or both inhibitors. After 18 hours of exposure to A $\beta$ Os, neurons were stained for MAP2, NeuN, and Cyclin D1 to mark neurons that had re-entered the cell cycle. (B) Quantification of the immunofluorescence results. Neither drug, alone or in combination, blocked A $\beta$ O-induced CCR. Calcium release by the ER therefore does not contribute significantly to the A $\beta$ O-induced calcium release that drives CCR. Indicated p values were calculated by one-way ANOVA using the Bonferroni post-hoc test. Error bars indicate s.e.m.
